# Supplementary material for: Aldo-Keto Reductase 1C15 Characterization and Protection in Ischemic Brain Injury
Source: MDPI journal article supplement (doi:10.3390/antiox12040909), 2023-04-11
Supplement: s1 [file s1]

## Supplementary Material

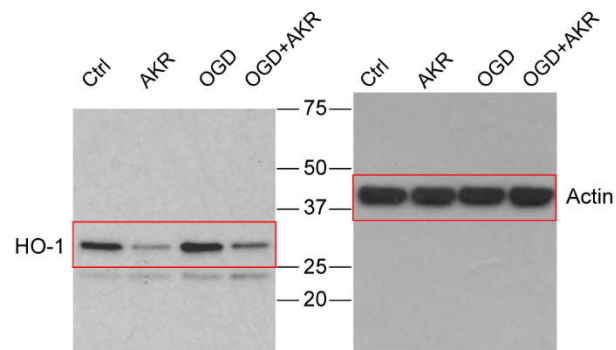

**Figure S1.** Whole blot for Western blot images in Figure 6C. Rectangles present areas cropped in Figure 6C.
